# Supplementary material for: Estimating Aboveground Biomass on Private Forest Using Sentinel-2 Imagery
Source: Hindawi journal article supplement (doi:10.1155/2018/6745629), 2018-12-16
Supplement: f1 [file 6745629.f1.docx]

**Supplementery materials**

1. **AGB and vegetation indices data in each sample plot**

| **Plot** | **AGB (Mg/ha)** | **Vegetation indices** | | | | | | |
| --- | --- | --- | --- | --- | --- | --- | --- | --- |
| **ND45** | **NDVI** | **SR** | **Evi** | **S2REP** | **MSR** | **GNDVI** |
| 1 | 21 | 0.59 | 0.84 | 11.60 | 0.48 | 718.90 | 2.41 | 0.70 |
| 2 | 98 | 0.70 | 0.92 | 24.64 | 0.57 | 721.50 | 3.96 | 0.80 |
| 3 | 75 | 0.66 | 0.89 | 17.36 | 0.51 | 720.00 | 3.17 | 0.79 |
| 4 | 64 | 0.59 | 0.87 | 14.43 | 0.59 | 721.54 | 2.80 | 0.75 |
| 5 | 65 | 0.57 | 0.84 | 11.71 | 0.59 | 719.64 | 2.42 | 0.71 |
| 6 | 175 | 0.79 | 0.96 | 44.78 | 0.56 | 723.84 | 5.69 | 0.86 |
| 7 | 92 | 0.64 | 0.89 | 17.03 | 0.66 | 720.62 | 3.13 | 0.76 |
| 8 | 69 | 0.63 | 0.88 | 15.52 | 0.61 | 720.07 | 2.94 | 0.74 |
| 9 | 25 | 0.58 | 0.86 | 13.26 | 0.61 | 720.80 | 2.64 | 0.72 |
| 10 | 69 | 0.65 | 0.89 | 16.89 | 0.56 | 721.10 | 3.11 | 0.76 |
| 11 | 42 | 0.54 | 0.79 | 8.32 | 0.42 | 717.37 | 1.88 | 0.64 |
| 12 | 63 | 0.64 | 0.87 | 14.37 | 0.60 | 718.82 | 2.79 | 0.73 |
| 13 | 95 | 0.66 | 0.89 | 16.42 | 0.60 | 719.67 | 3.05 | 0.73 |
| 14 | 84 | 0.69 | 0.91 | 20.71 | 0.50 | 720.96 | 3.55 | 0.81 |
| 15 | 101 | 0.65 | 0.90 | 18.94 | 0.57 | 722.24 | 3.35 | 0.80 |
| 16 | 71 | 0.62 | 0.88 | 15.14 | 0.64 | 720.46 | 2.89 | 0.75 |
| 17 | 67 | 0.63 | 0.90 | 19.44 | 0.56 | 722.91 | 3.41 | 0.80 |
| 18 | 125 | 0.69 | 0.91 | 20.69 | 0.65 | 721.16 | 3.55 | 0.78 |
| 19 | 175 | 0.75 | 0.93 | 26.12 | 0.65 | 720.11 | 4.11 | 0.78 |
| 20 | 101 | 0.69 | 0.91 | 21.37 | 0.55 | 720.75 | 3.62 | 0.77 |
| 21 | 137 | 0.71 | 0.92 | 23.51 | 0.63 | 720.75 | 3.85 | 0.79 |
| 22 | 226 | 0.84 | 0.96 | 51.91 | 0.62 | 721.76 | 6.20 | 0.84 |
| 23 | 48 | 0.57 | 0.87 | 14.58 | 0.62 | 721.38 | 2.82 | 0.76 |
| 24 | 58 | 0.57 | 0.83 | 11.04 | 0.55 | 718.68 | 2.32 | 0.70 |
| 25 | 158 | 0.71 | 0.92 | 25.53 | 0.62 | 721.41 | 4.05 | 0.79 |
| 26 | 32 | 0.55 | 0.80 | 9.19 | 0.52 | 717.09 | 2.03 | 0.68 |
| 27 | 32 | 0.58 | 0.85 | 12.11 | 0.49 | 719.60 | 2.48 | 0.71 |
| 28 | 106 | 0.72 | 0.91 | 20.33 | 0.59 | 718.50 | 3.51 | 0.74 |
| 29 | 62 | 0.63 | 0.90 | 18.30 | 0.47 | 721.78 | 3.28 | 0.79 |
| 30 | 90 | 0.75 | 0.94 | 34.88 | 0.54 | 723.29 | 4.91 | 0.82 |

1. **AGB data for model validation**

| **Plot** | **Observed AGB (Mg/ha)** | **Predicted AGB (Mg/ha)** |
| --- | --- | --- |
| 31 | 86 | 120 |
| 32 | 125 | 175 |
| 33 | 82 | 123 |
| 34 | 96 | 112 |
| 35 | 74 | 103 |
| 36 | 93 | 118 |
| 37 | 82 | 94 |
| 38 | 97 | 125 |
| 39 | 56 | 56 |
| 40 | 76 | 114 |
| 41 | 43 | 72 |
| 42 | 61 | 73 |
| 43 | 80 | 68 |
| 44 | 56 | 37 |
| 45 | 75 | 72 |

1. **Data collection documentation**

**
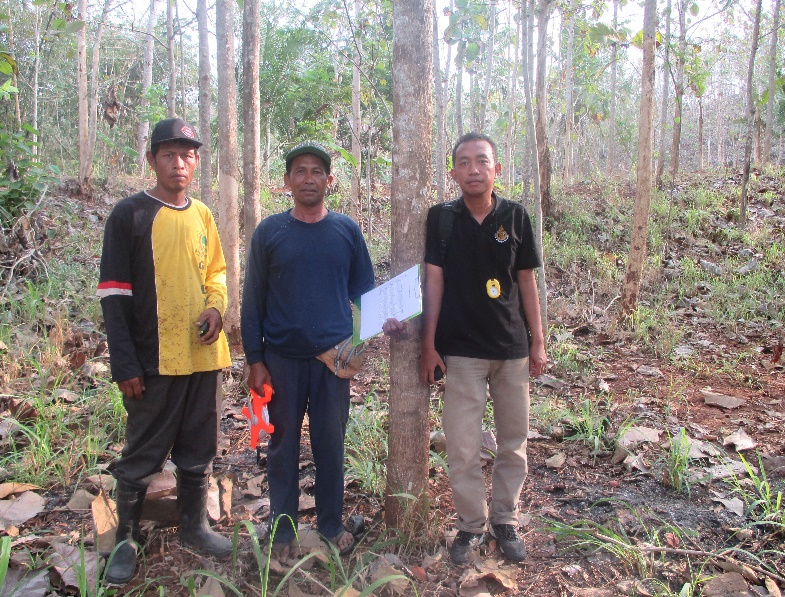
**

**
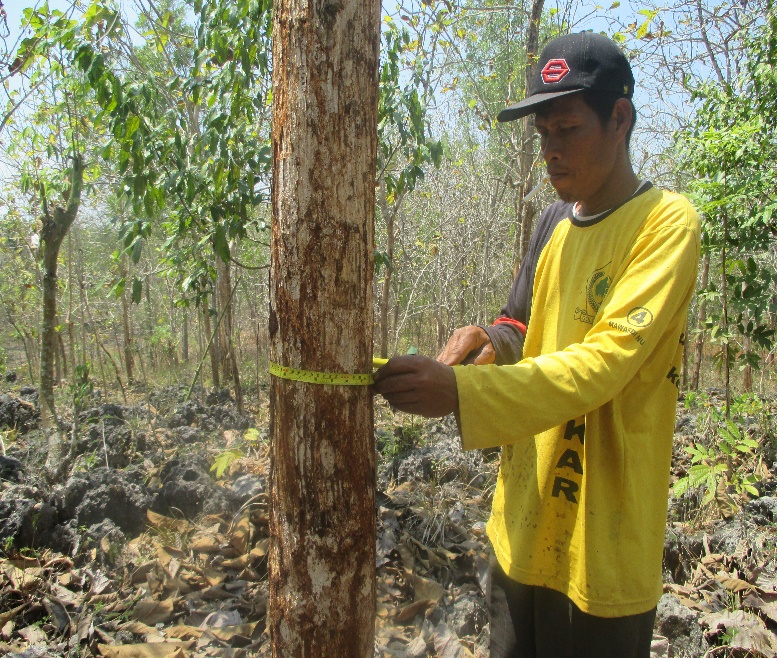
**

**
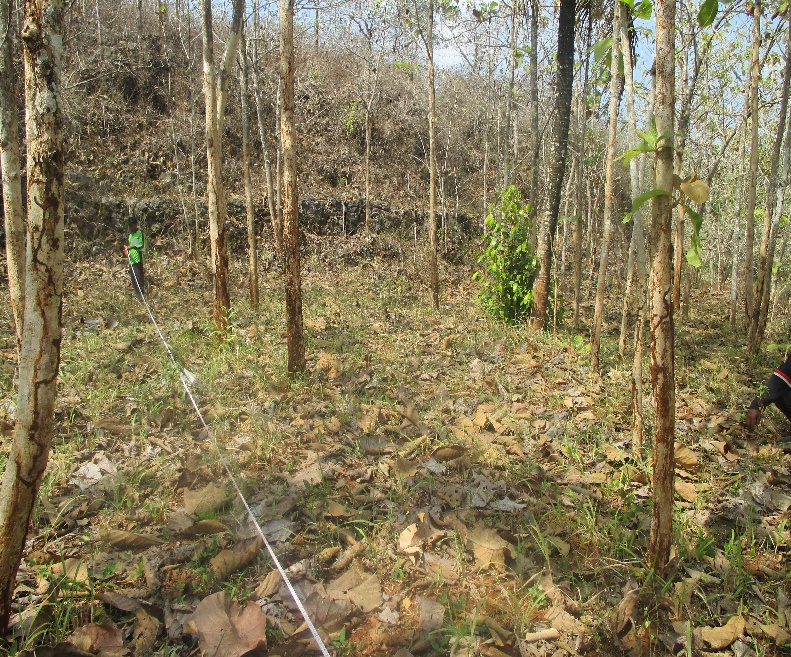
**

**
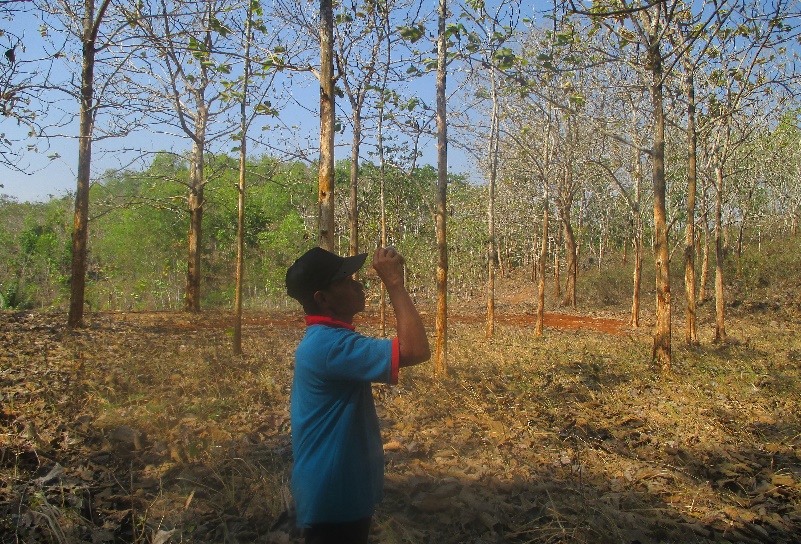
**

**
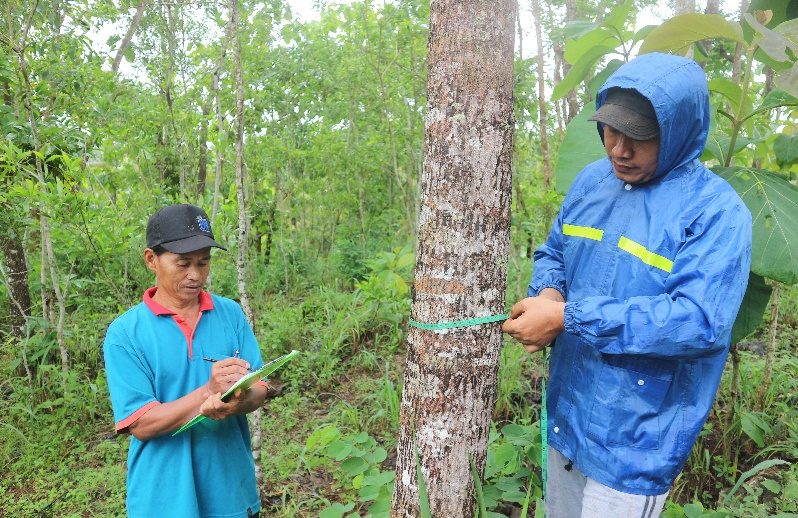
**

**
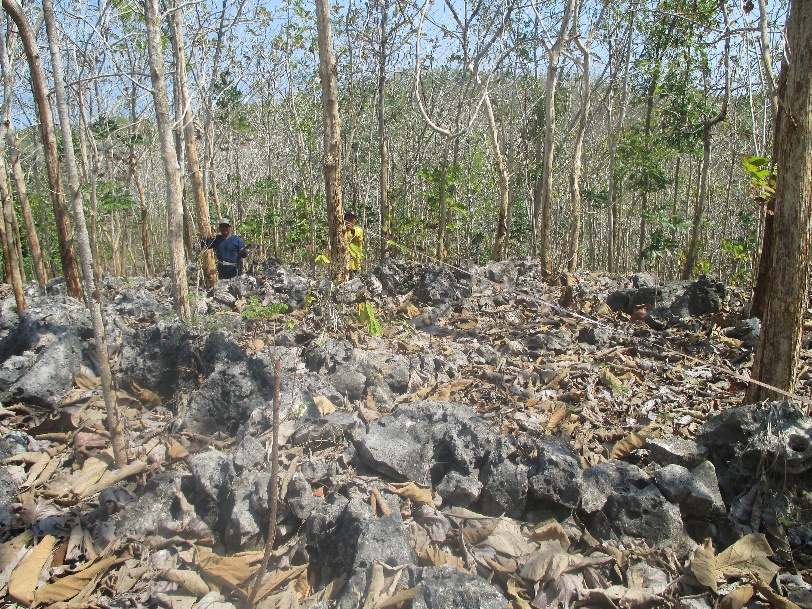
**
